# Supplementary material for: Effects of l-carnitine supplementation on glucolipid metabolism: a systematic review and meta-analysis
Source: Royal Society of Chemistry journal article supplement (doi:10.1039/d2fo02930h), 2023-01-01

(a) ASI

| Study or Subgroup | Experimental |          |       | Control |        |       | Weight | Mean Difference    |                    |
|-------------------|--------------|----------|-------|---------|--------|-------|--------|--------------------|--------------------|
|                   | Mean         | SD       | Total | Mean    | SD     | Total |        | IV, Random, 95% CI | IV, Random, 95% CI |
| Alavinejad 2016   | 96.3         | 7        | 28    | 126.1   | 11     | 16    | 17.7%  | -29.80             | [-35.78, -23.82]   |
| Bae 2015          | 35.7         | 22.9     | 39    | 50.98   | 30.1   | 39    | 15.7%  | -15.28             | [-27.15, -3.41]    |
| Hong 2014         | 33.8         | 17.1     | 26    | 35.2    | 16.3   | 26    | 16.7%  | -1.40              | [-10.48, 7.68]     |
| Jung 2020         | 31.1         | 21.3     | 24    | 34.1    | 26     | 251   | 16.7%  | -3.00              | [-12.11, 6.11]     |
| Malaguamera 2010  | 56.4         | 18.2     | 36    | 78.1    | 21.4   | 38    | 16.7%  | -21.70             | [-30.74, -12.66]   |
| Somi 2014         | 71.67        | 36.3     | 40    | 62.9    | 33.6   | 40    | 14.3%  | 8.77               | [-6.56, 24.10]     |
| Trang 2020        | 128.9743     | 125.2288 | 13    | 65.5881 | 72.029 | 13    | 2.1%   | 63.39              | [-15.14, 141.92]   |

Total (95% CI) 206 423 100.0% -9.42 [-21.64, 2.80]

Heterogeneity: Tau<sup>2</sup> = 210.94; Chi<sup>2</sup> = 53.70, df = 6 (P < 0.00001); I<sup>2</sup> = 89%

Test for overall effect: Z = 1.51 (P = 0.13)

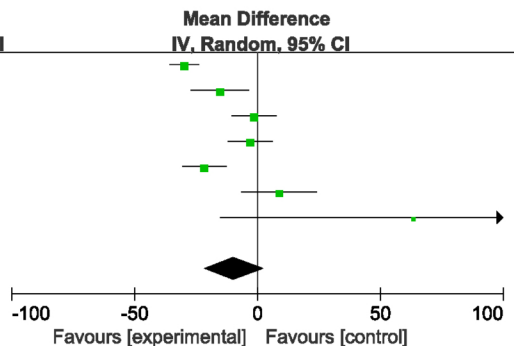

(b) ALT

| Study or Subgroup | Experimental |          |       | Control |         |       | Weight | Mean Difference    |                    |
|-------------------|--------------|----------|-------|---------|---------|-------|--------|--------------------|--------------------|
|                   | Mean         | SD       | Total | Mean    | SD      | Total |        | IV, Random, 95% CI | IV, Random, 95% CI |
| Alavinejad 2016   | 82.1         | 5.2      | 28    | 115     | 6.2     | 16    | 17.4%  | -32.90             | [-36.50, -29.30]   |
| Bae 2015          | 21.2         | 38.7     | 39    | 73.82   | 37.1    | 39    | 15.1%  | -52.62             | [-69.45, -35.79]   |
| Hong 2014         | 19.8         | 15.5     | 26    | 52.2    | 23.8    | 26    | 16.4%  | -32.40             | [-43.32, -21.48]   |
| Jung 2020         | 30.2         | 13.1     | 24    | 27.8    | 18.3    | 251   | 17.2%  | 2.40               | [-3.31, 8.11]      |
| Malaguamera 2010  | 51.8         | 16.4     | 36    | 75.4    | 13.9    | 38    | 17.1%  | -23.60             | [-30.54, -16.66]   |
| Somi 2014         | 81.2         | 37.4     | 40    | 61.1    | 30.1    | 40    | 15.5%  | 20.10              | [5.22, 34.98]      |
| Trang 2020        | 349.7965     | 259.7228 | 13    | 90.517  | 95.0424 | 13    | 1.2%   | 259.28             | [108.94, 409.62]   |

Total (95% CI) 206 423 100.0% -16.28 [-33.57, 1.00]

Heterogeneity: Tau<sup>2</sup> = 442.75; Chi<sup>2</sup> = 165.68, df = 6 (P < 0.00001); I<sup>2</sup> = 96%

Test for overall effect: Z = 1.85 (P = 0.06)

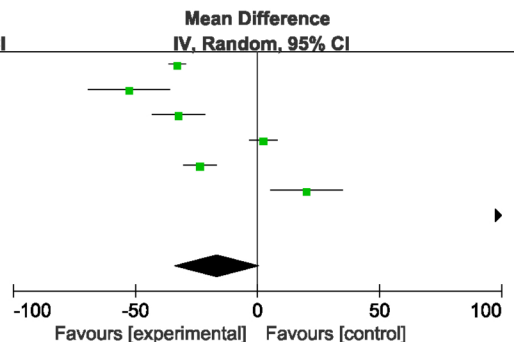

Supplement: d2fo02930h4.pdf [file d2fo02930h4.pdf]
