# Supplementary material for: Effects of l-carnitine supplementation on glucolipid metabolism: a systematic review and meta-analysis
Source: Royal Society of Chemistry journal article supplement (doi:10.1039/d2fo02930h), 2023-01-01
Supplement: d2fo02930h1.pdf [file d2fo02930h1.pdf]

#1

MESH: carnitine

Free-word:

Levocarnitine

Vitamin BT

L-Carnitine

L Carnitine

Bicarnesine

**Add to other literature:**

[L-carnitine tartrate](#)

[acetyl carnitine](#)

[acetyl-l-carnitine](#)

#2

MESH:Blood Glucose

Free-word:

Blood Sugar

Sugar, Blood

Glucose, Blood

**Add to other literatures:**

[Fasting Blood Sugar](#)

[Fasting Blood glucose](#)

[FBS](#)

[fasting plasma glucose](#)

[FBG](#)

#3

MESH: lipids

Free-word: Lipid

**Add to other literatures:**

[HDL Lipoprotein](#)

[High-Density Lipoprotein](#)

[HDL](#)

[HDL-c](#)

[HDL cholesterol](#)

[Cholesterol](#)

[Triacylglycerol](#)

[Triglyceride](#)

#4

MESH: Insulin Resistance

Free-word:

Resistance, Insulin

Insulin Sensitivity

Sensitivity, Insulin

**Add to other literatures:**

[Insulin Resistance Syndrome X](#)

[Hyperinsulinemia](#)

[glucose intolerance](#)

[HOMA-IR](#)

[IR](#)

#5

MESH: Metabolism

Free-word: Metabolic Processes

Processes, Metabolic

Metabolic Process

Process, Metabolic

Metabolic Phenomena

Phenomena, Metabolic

Metabolism Concepts

Concept, Metabolism

Concepts, Metabolism

Metabolism Concept

Metabolic Phenomenon

Phenomenon, Metabolic

Metabolism Phenomena

Phenomena, Metabolism

Metabolic Concepts

Concept, Metabolic

Concepts, Metabolic

Metabolic Concept

Anabolism

Catabolism

**Add to other literatures:**

[metabolic syndrome](#)

[syndrome X](#)

[Metabolic Syndrome X](#)

[Metabolic X Syndrome](#)

[Reaven Syndrome X](#)

Method:

#1 AND [ (#2 AND #5) OR (#3 AND #5) OR #4]
