# Supplementary figures and images for: Effects of l-carnitine supplementation on glucolipid metabolism: a systematic review and meta-analysis
Source: Royal Society of Chemistry journal article supplement (doi:10.1039/d2fo02930h), 2023-01-01

Effect %

(95% CI) Weight

Study

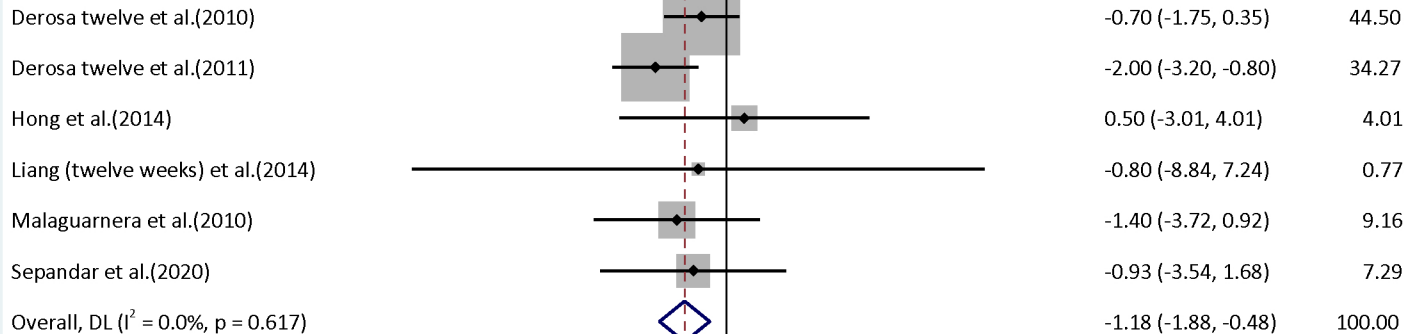

-10

0

10

Supplement: d2fo02930h2.pdf [file d2fo02930h2.pdf]

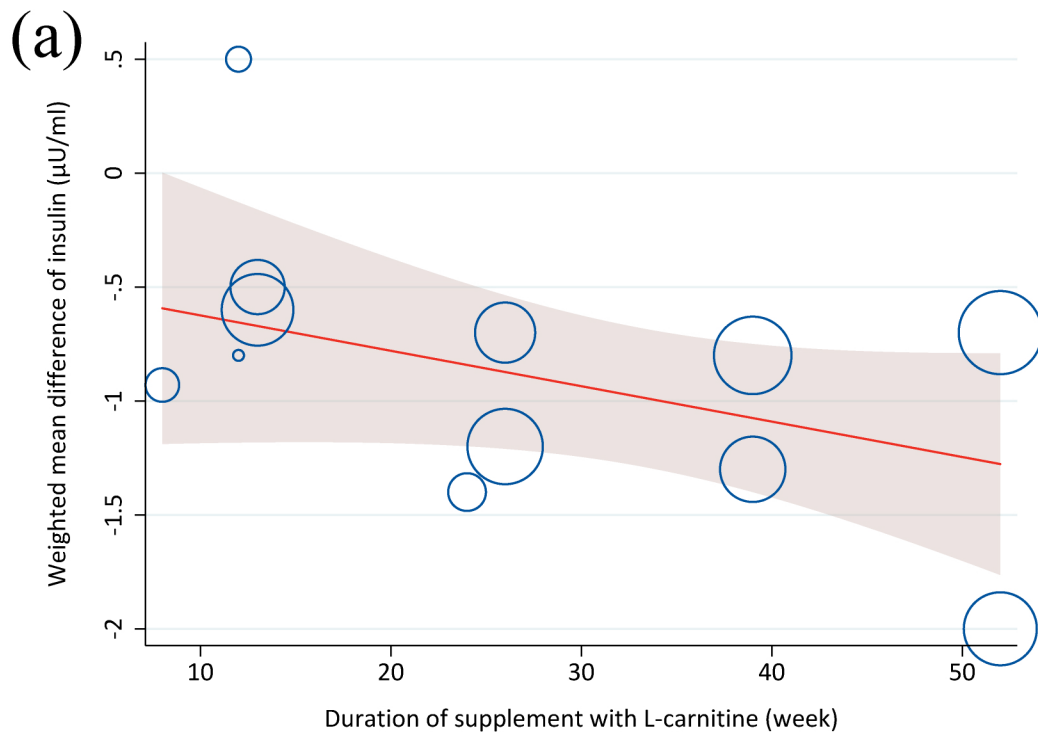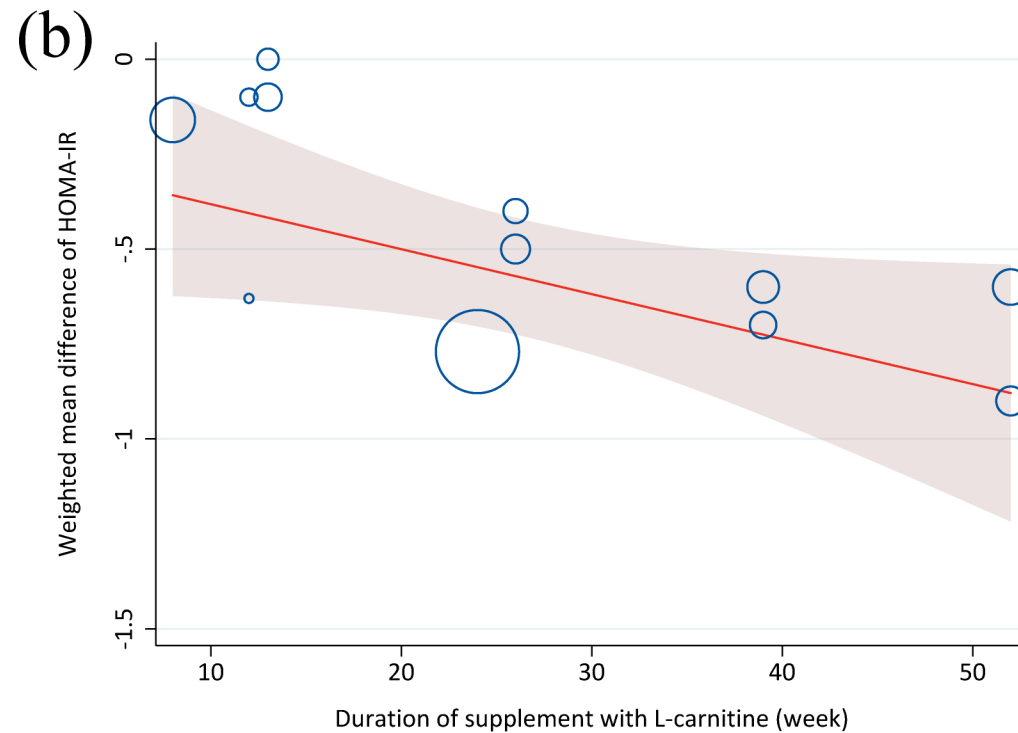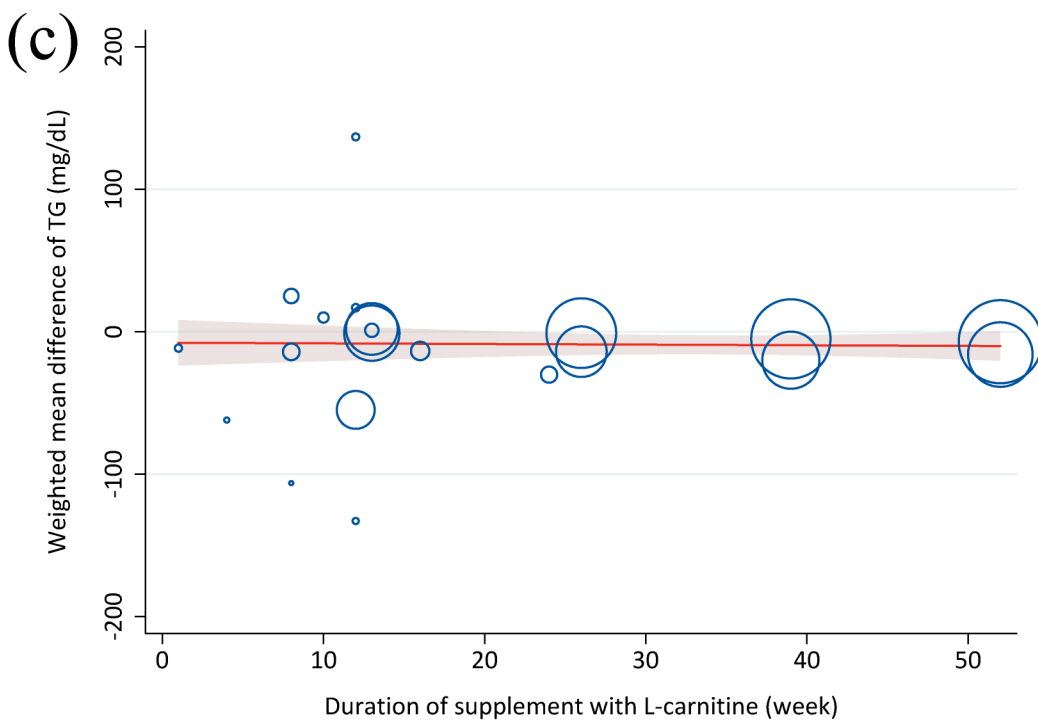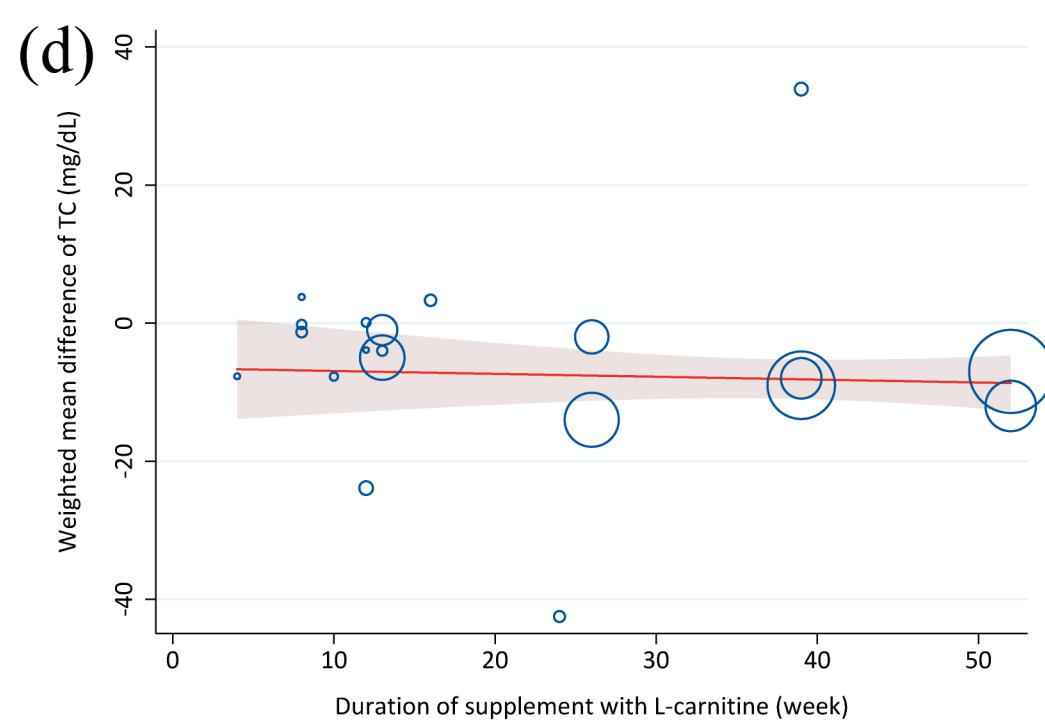

Supplement: d2fo02930h5.pdf [file d2fo02930h5.pdf]

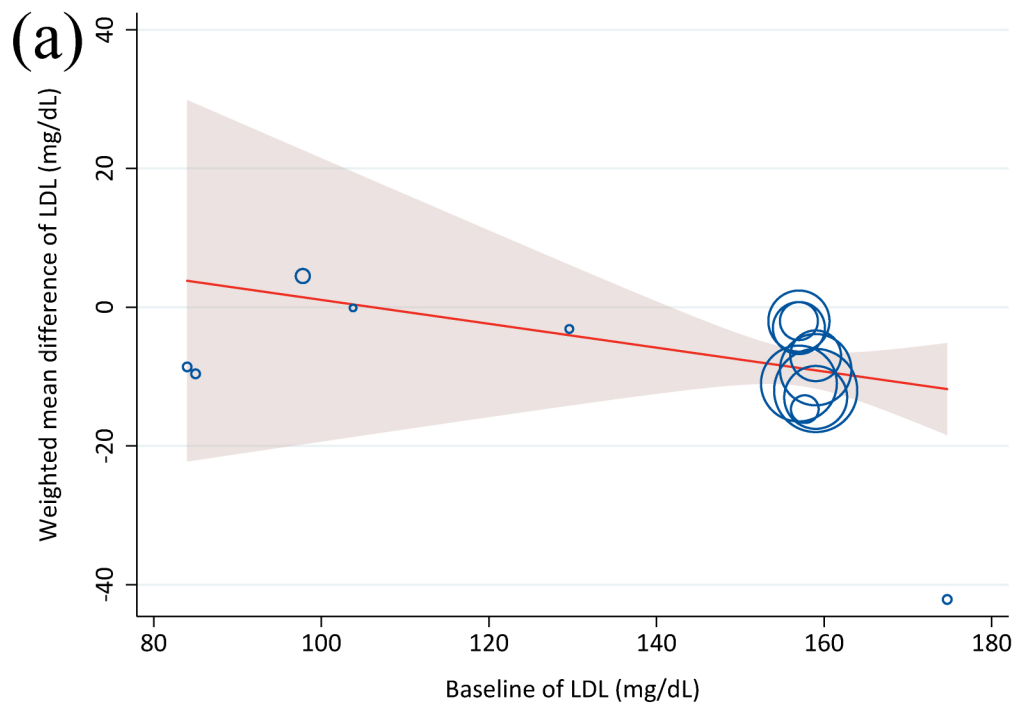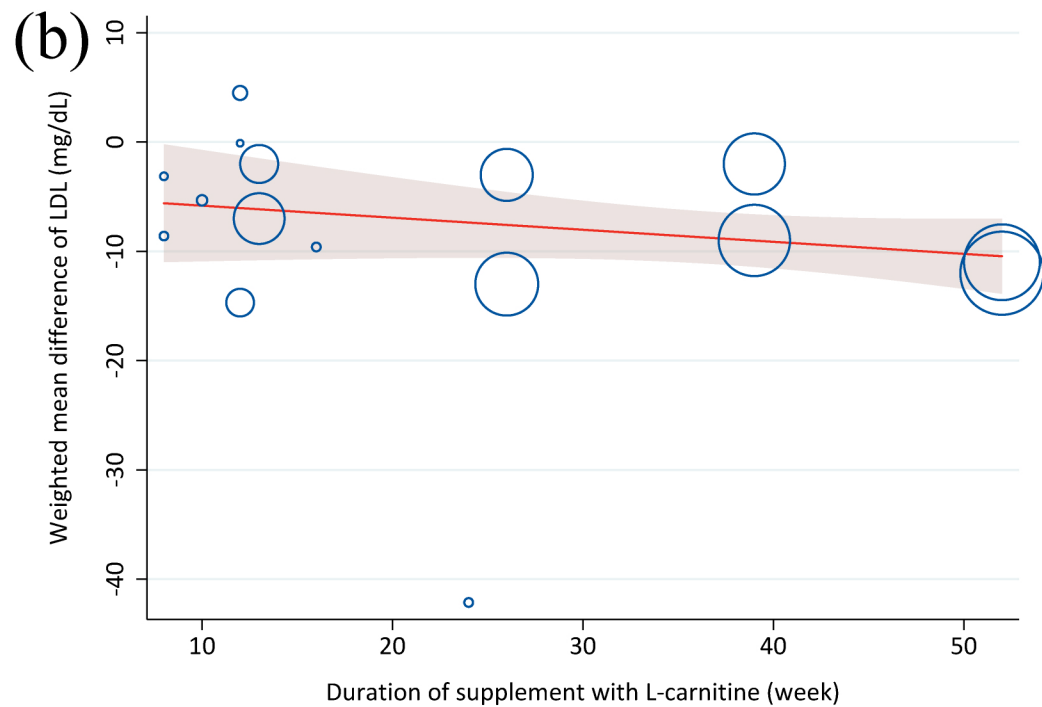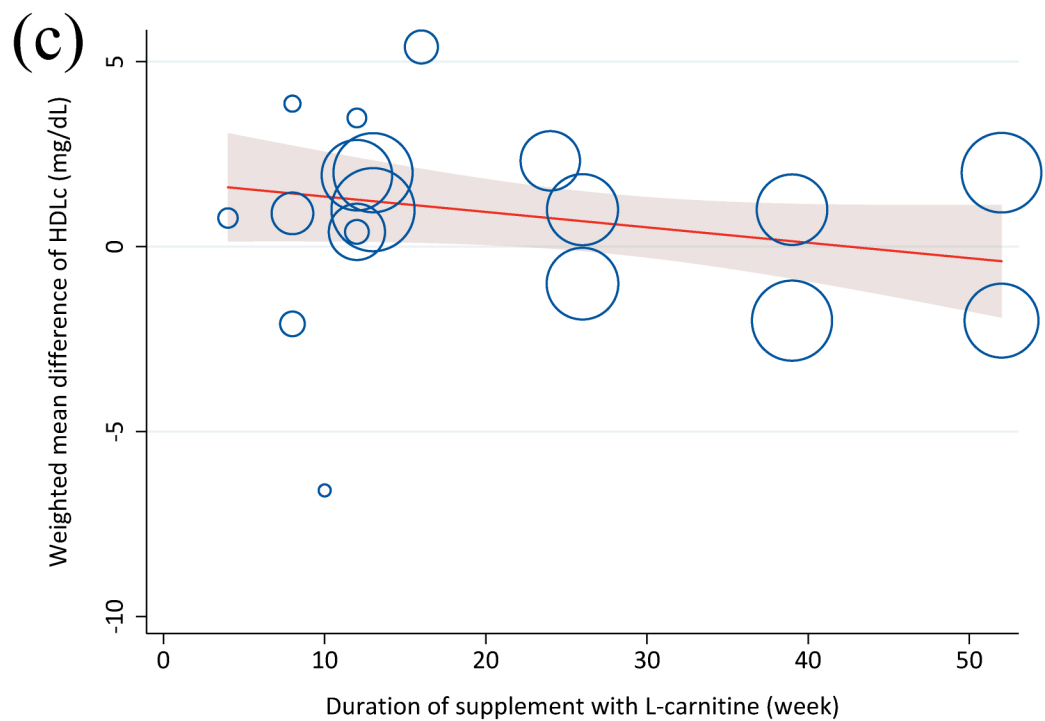

Supplement: d2fo02930h6.pdf [file d2fo02930h6.pdf]
